# Supplementary material for: Factors enforcing the species boundary between the human pathogens Cryptococcus neoformans and Cryptococcus deneoformans
Source: PubMed Central journal article supplement (PMC7846113; doi:10.1371/journal.pgen.1008871), 2021-01-19

**A** H99α × JEC20a

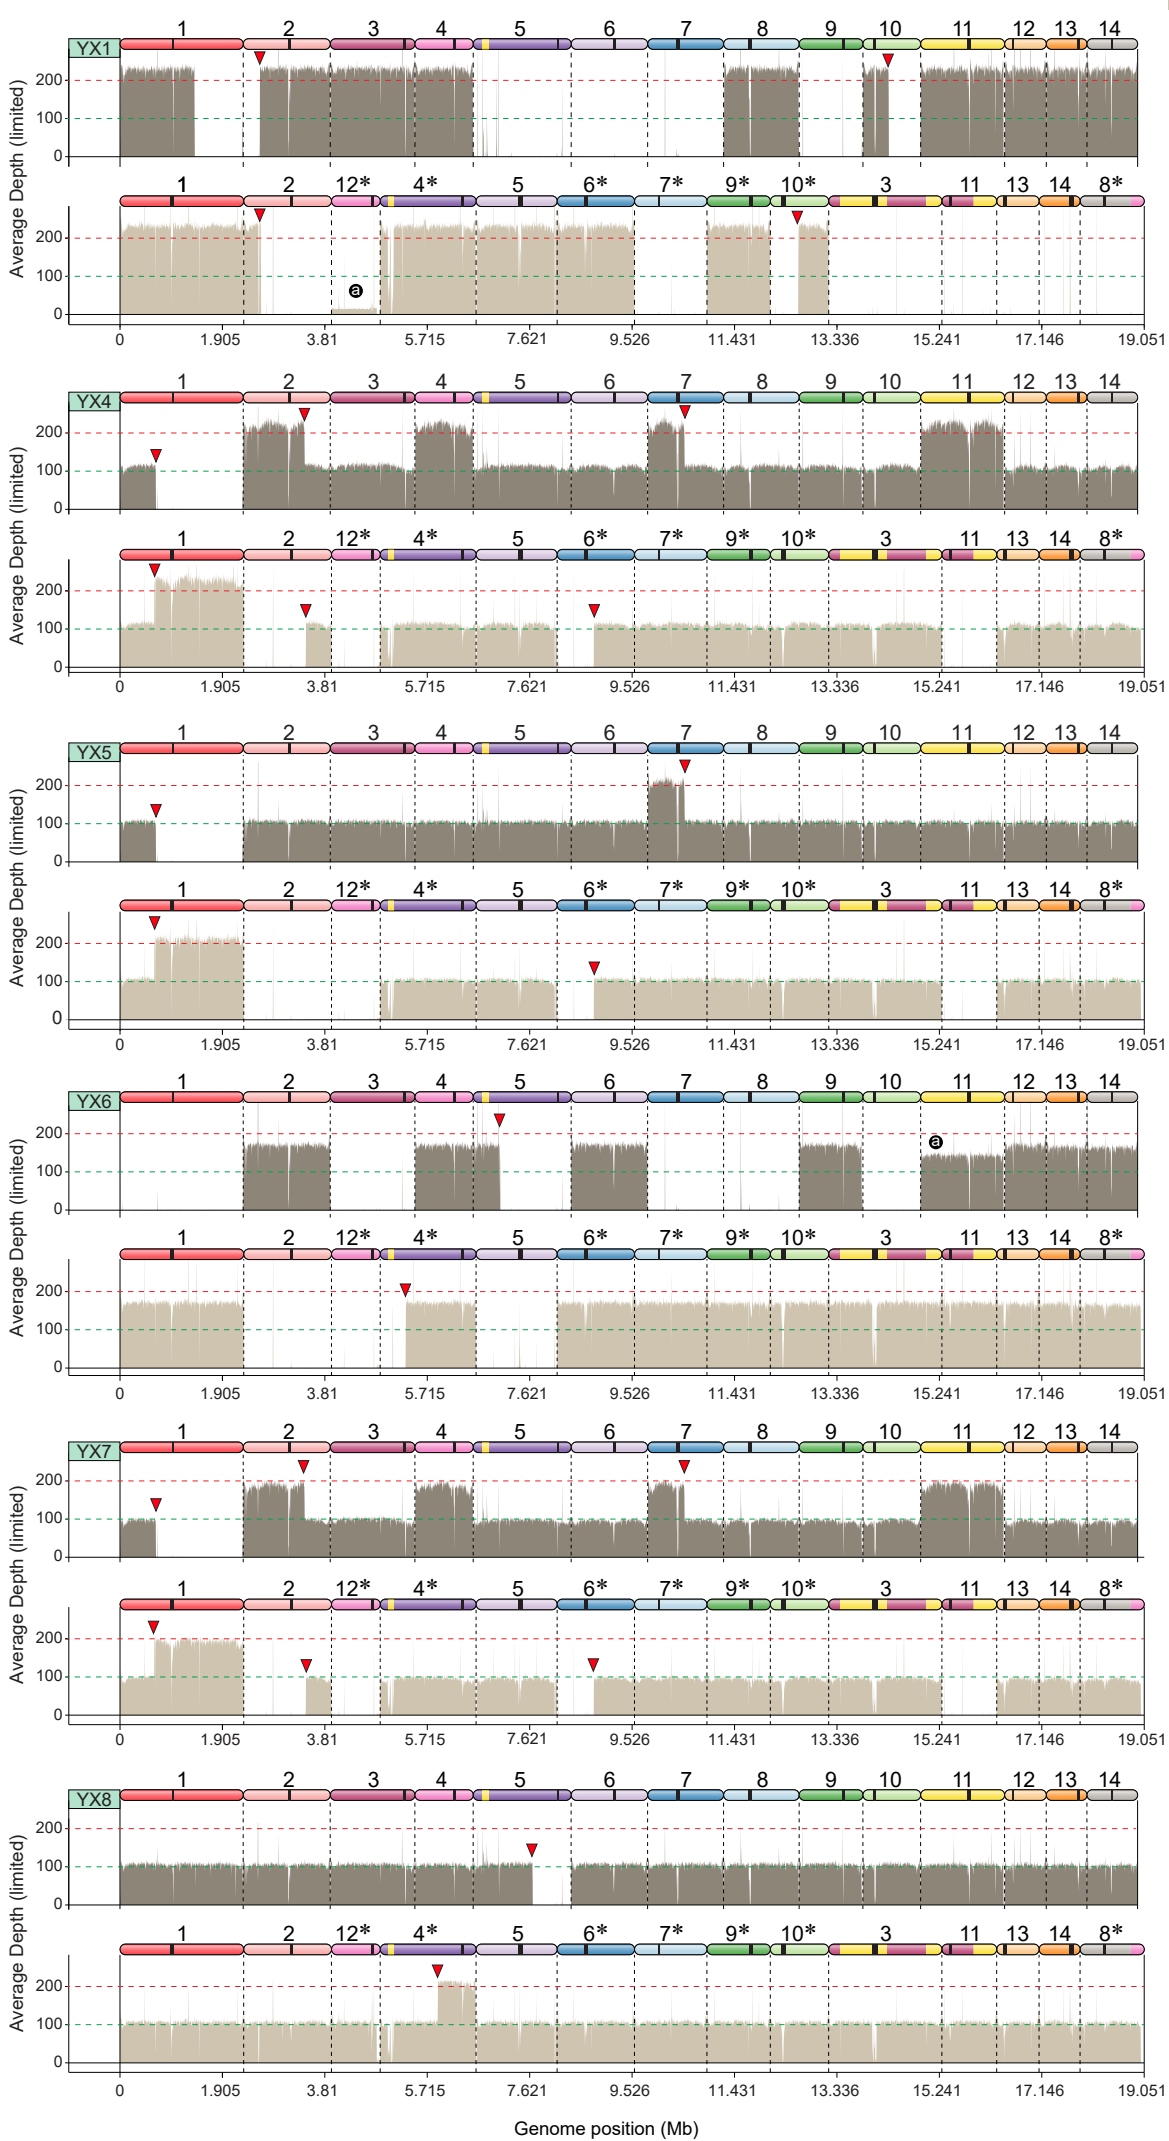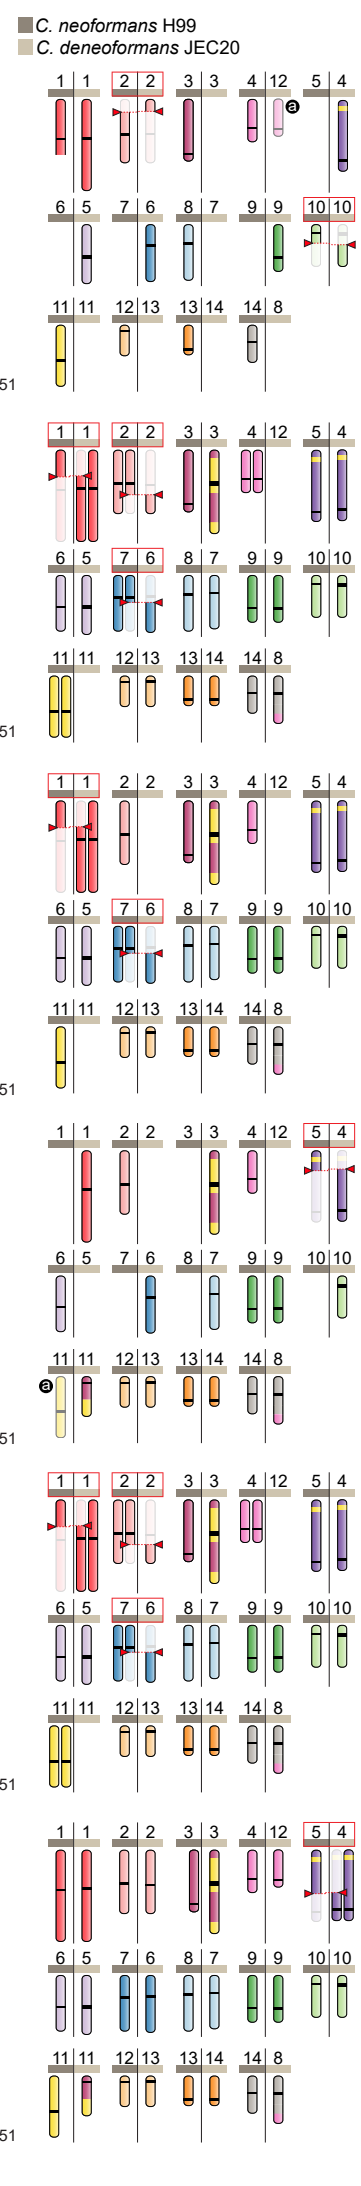

**B** H99 $\alpha$   $\times$  JEC20a *msh2* $\Delta$ -1

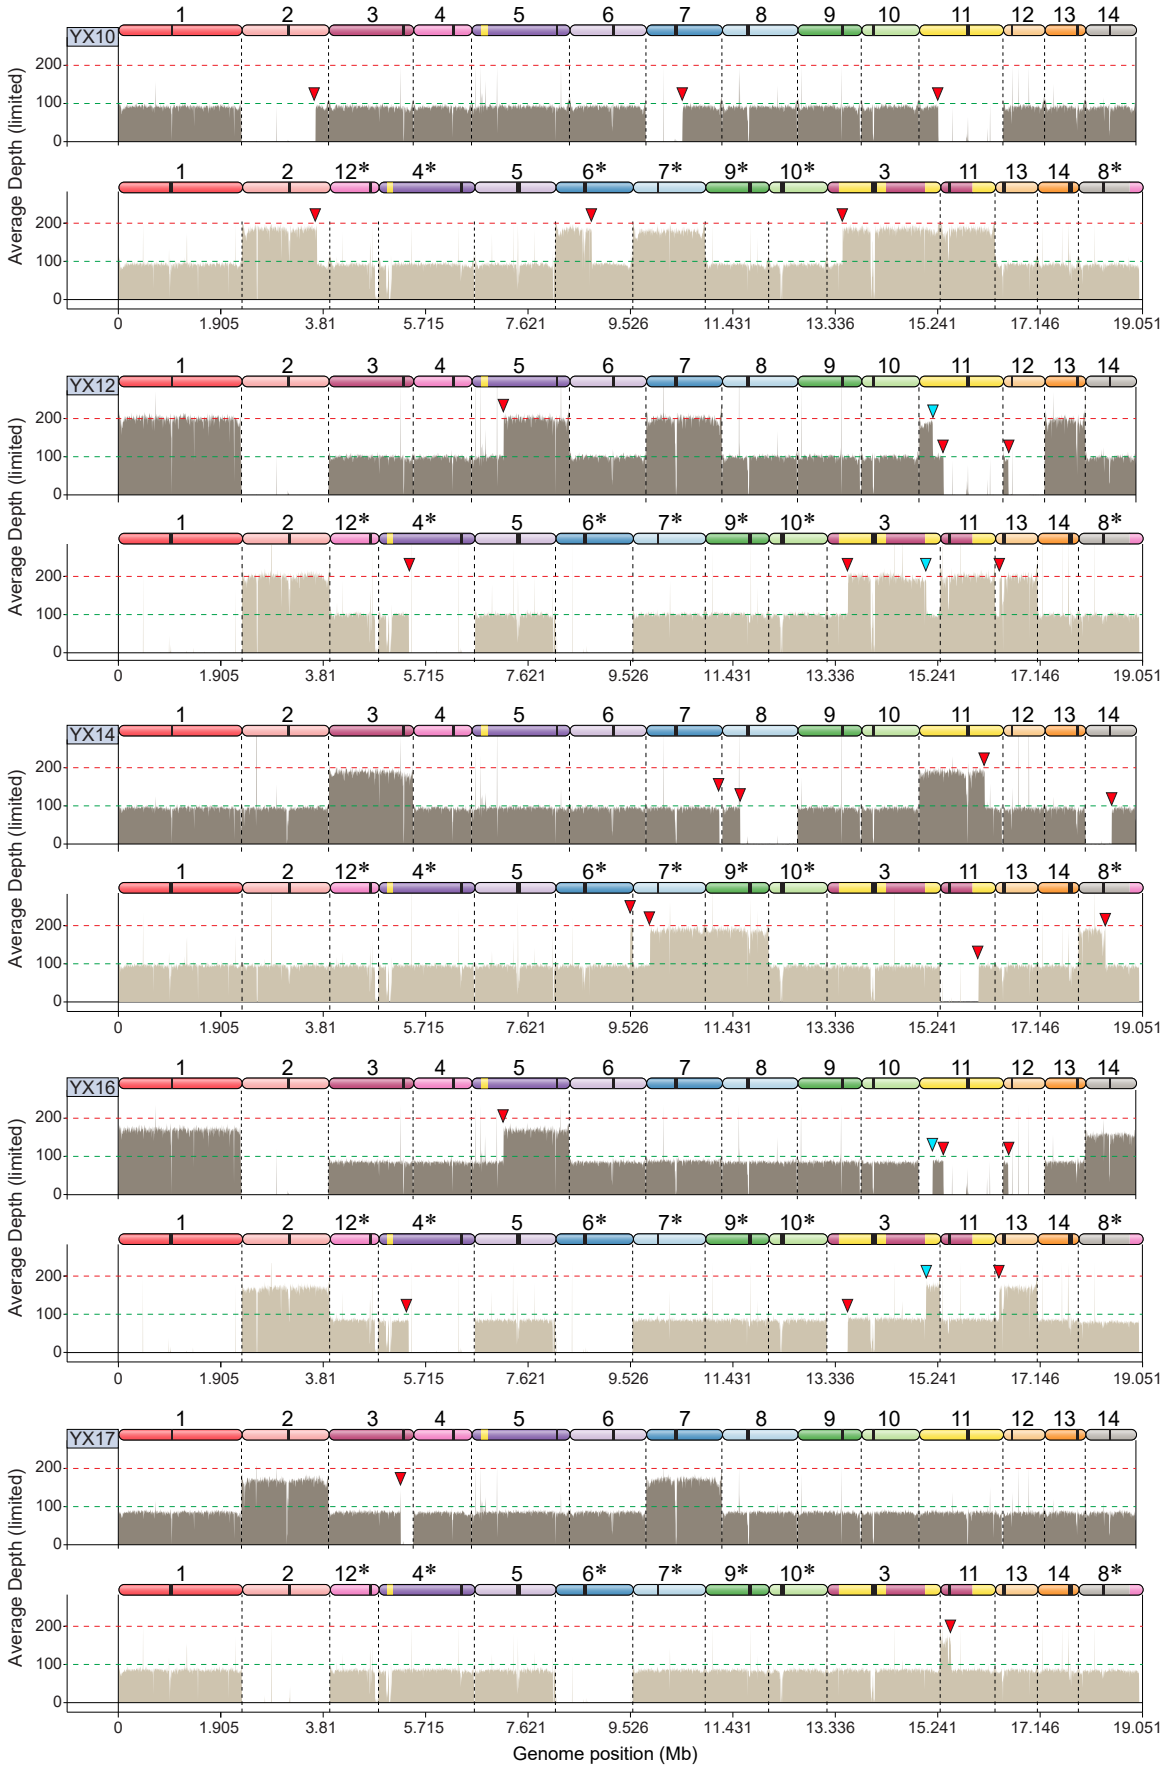

■ *C. neoformans* H99  
 ■ *C. deneoformans* JEC20

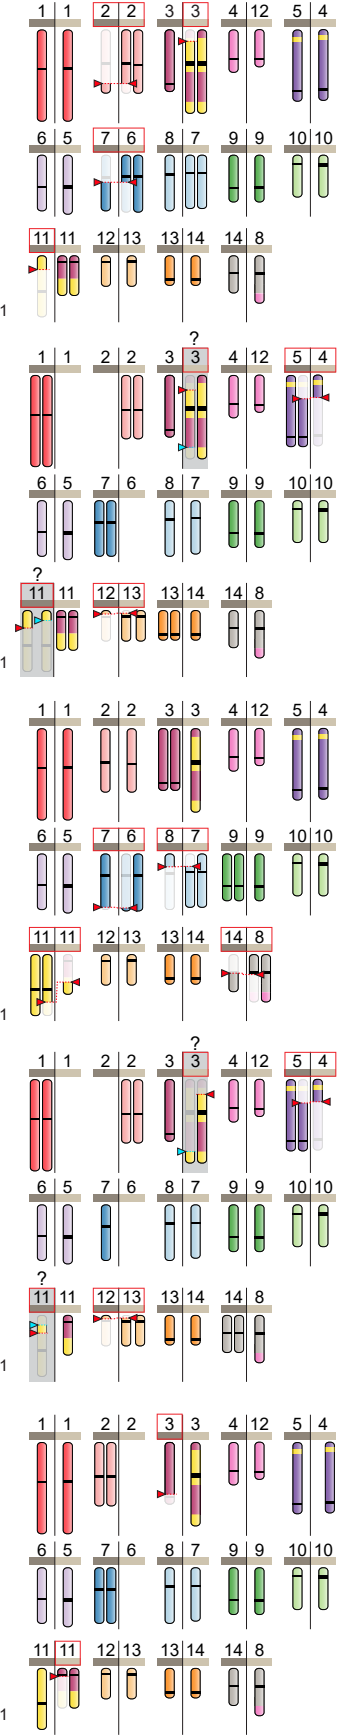

**C** KN99 $\alpha$  *msh2* $\Delta$   $\times$  JEC20a

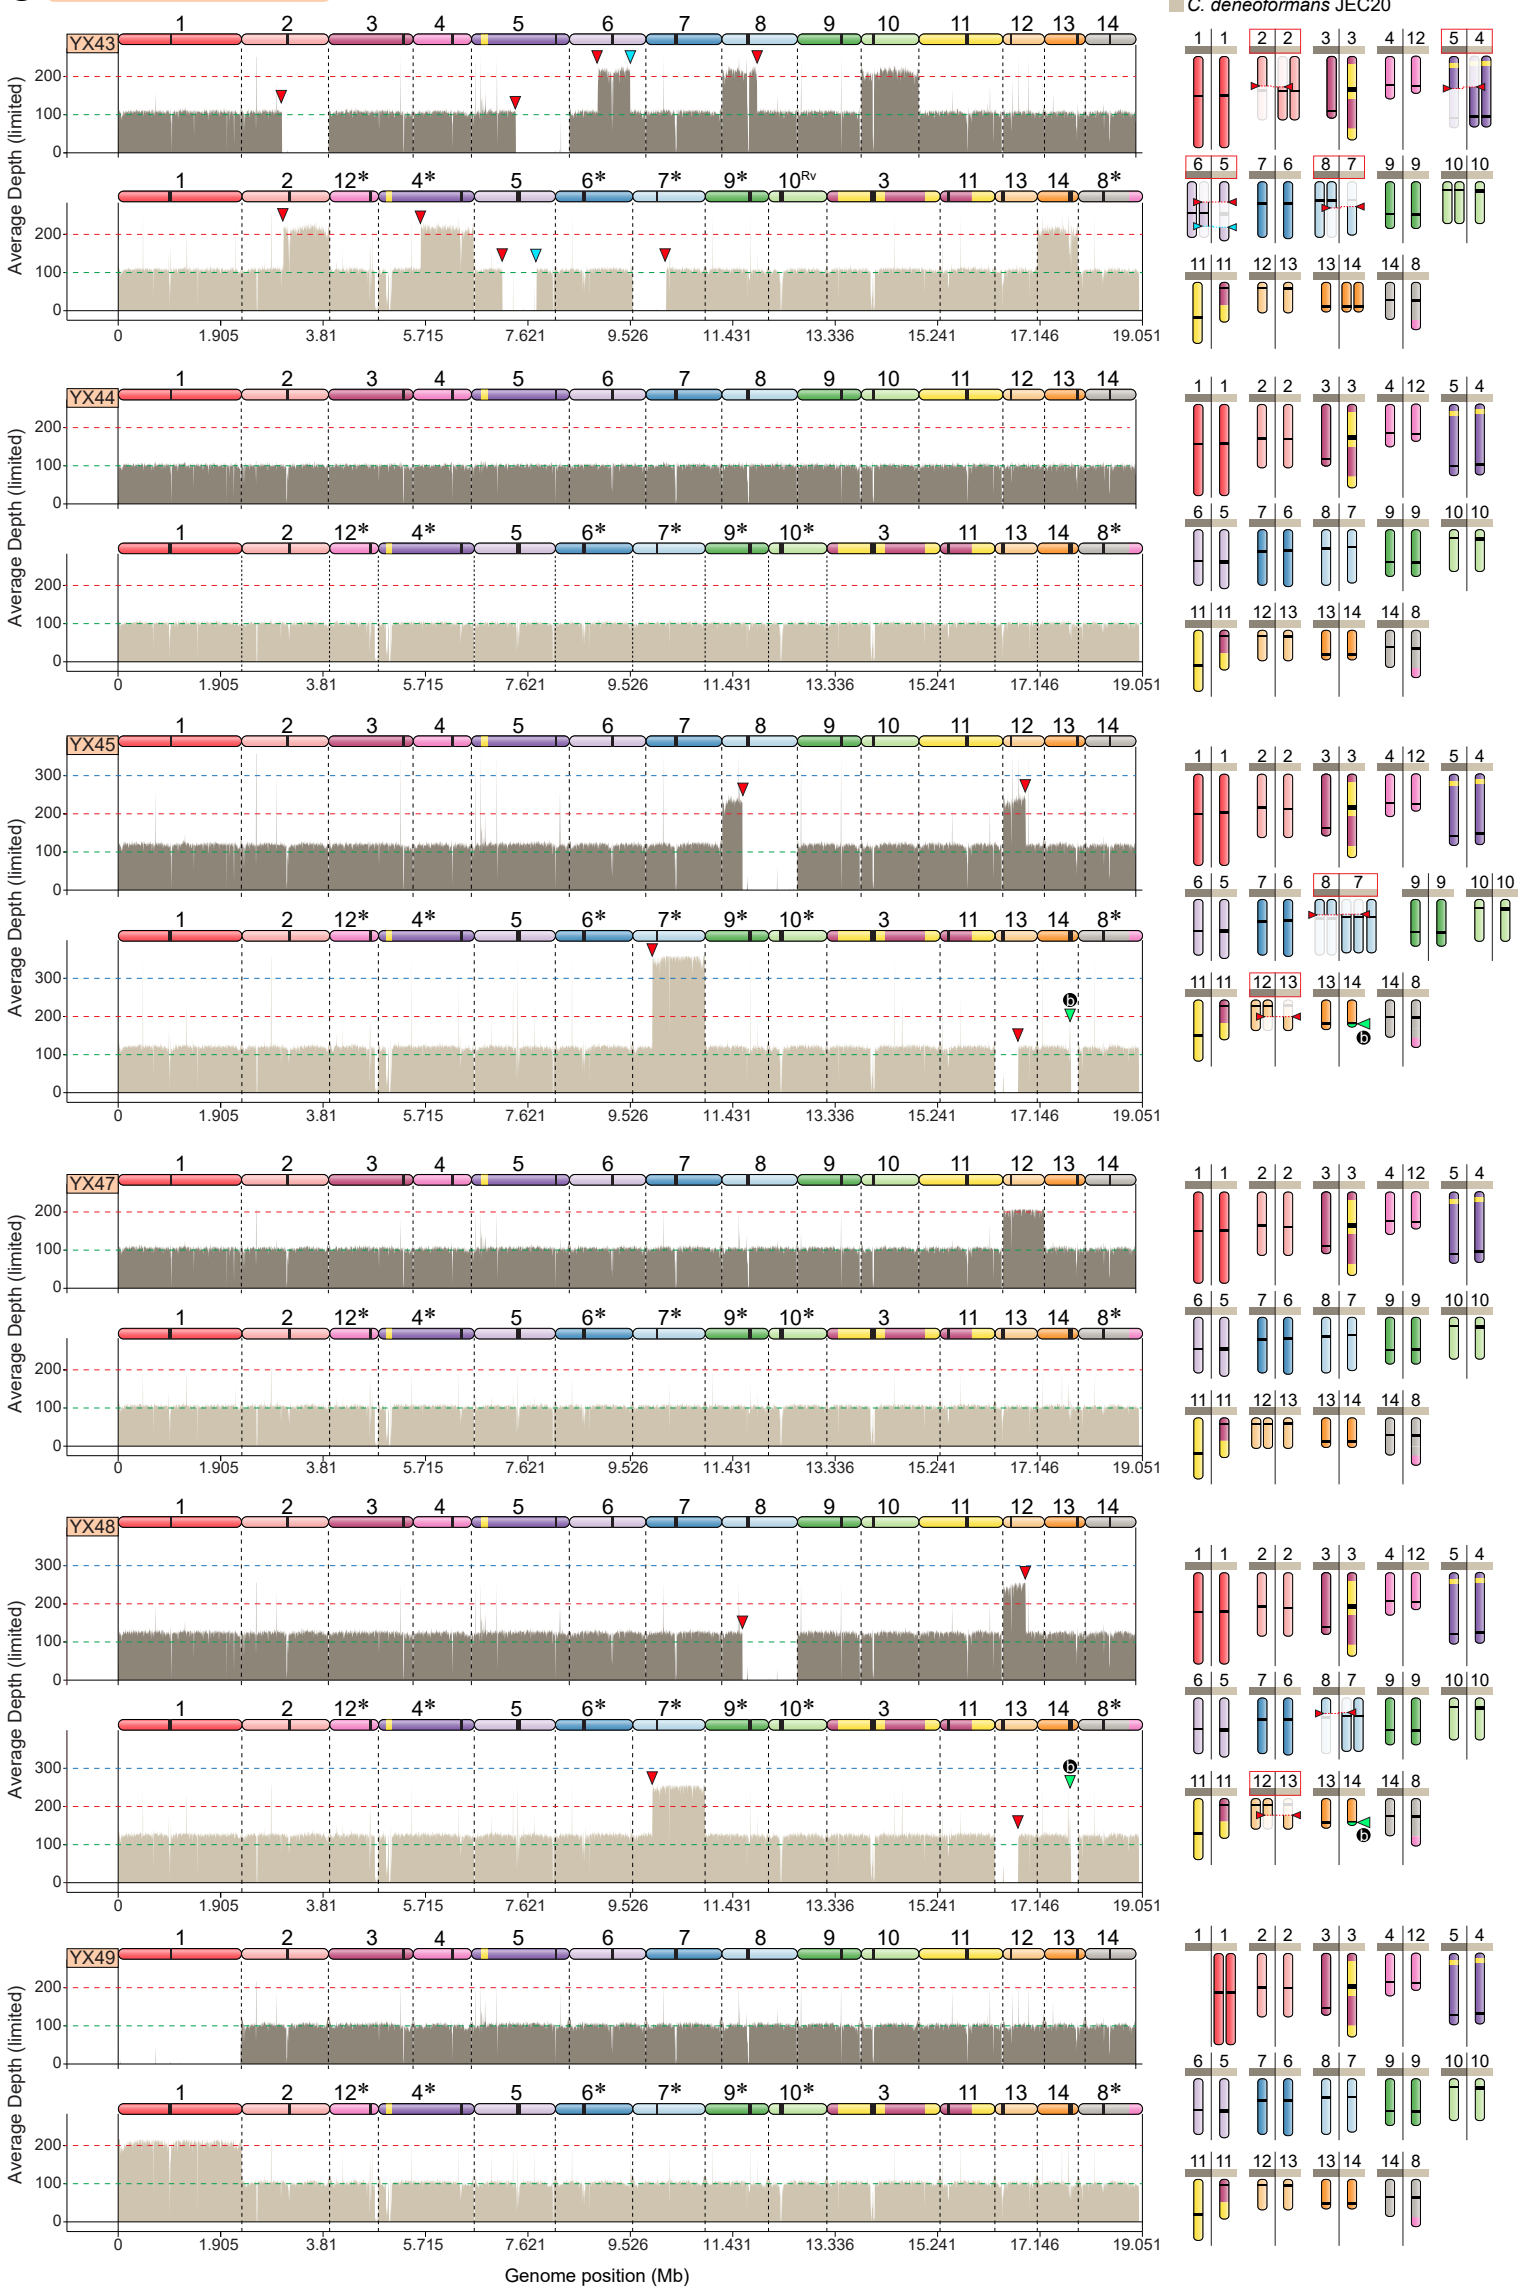

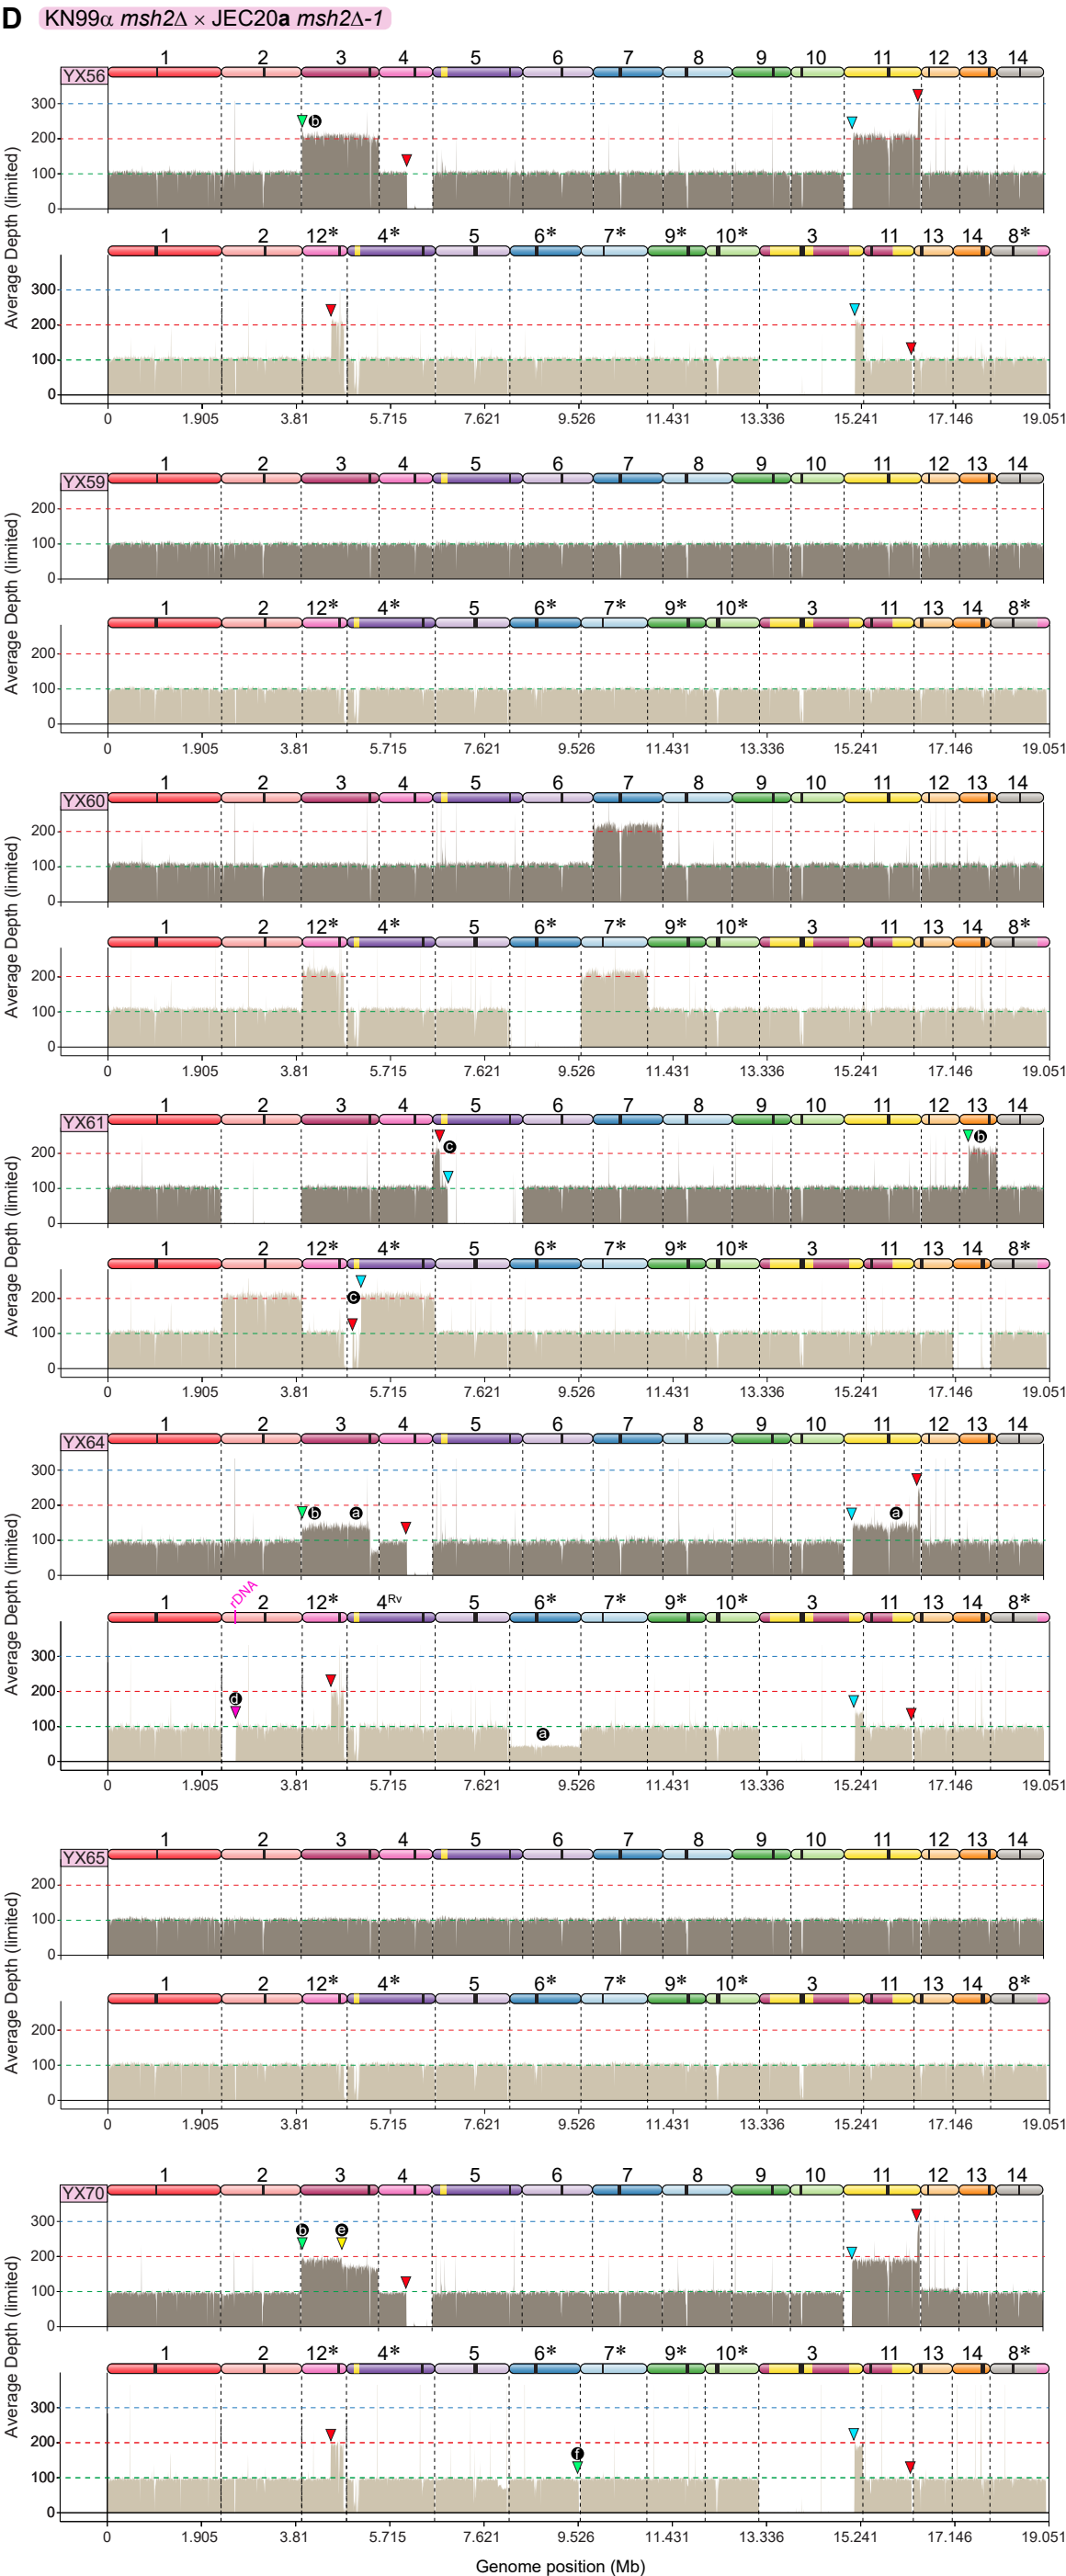

**C. neoformans H99**  
**C. deneoformans JEC20**

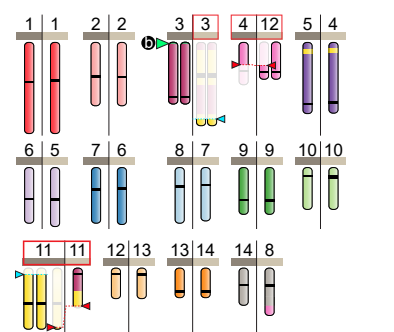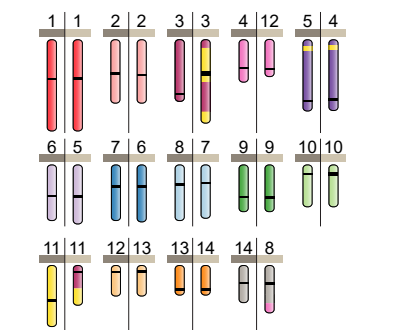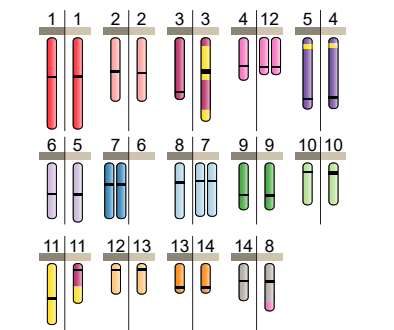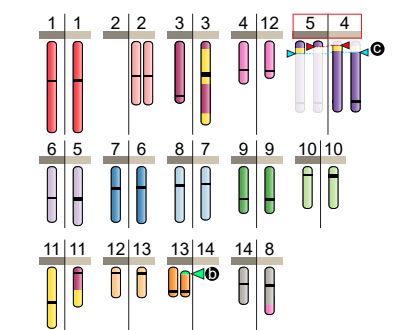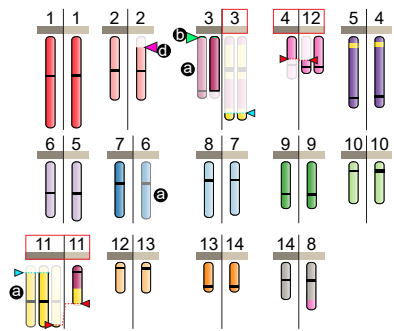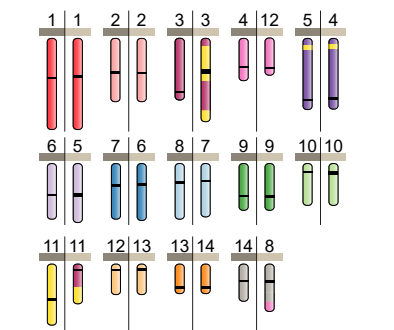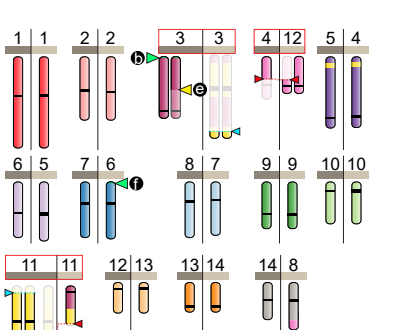

Supplement: pgen.1008871.s019.pdf [file pgen.1008871.s019.pdf]
