# Supplementary material for: Factors enforcing the species boundary between the human pathogens Cryptococcus neoformans and Cryptococcus deneoformans
Source: PubMed Central journal article supplement (PMC7846113; doi:10.1371/journal.pgen.1008871), 2021-01-19

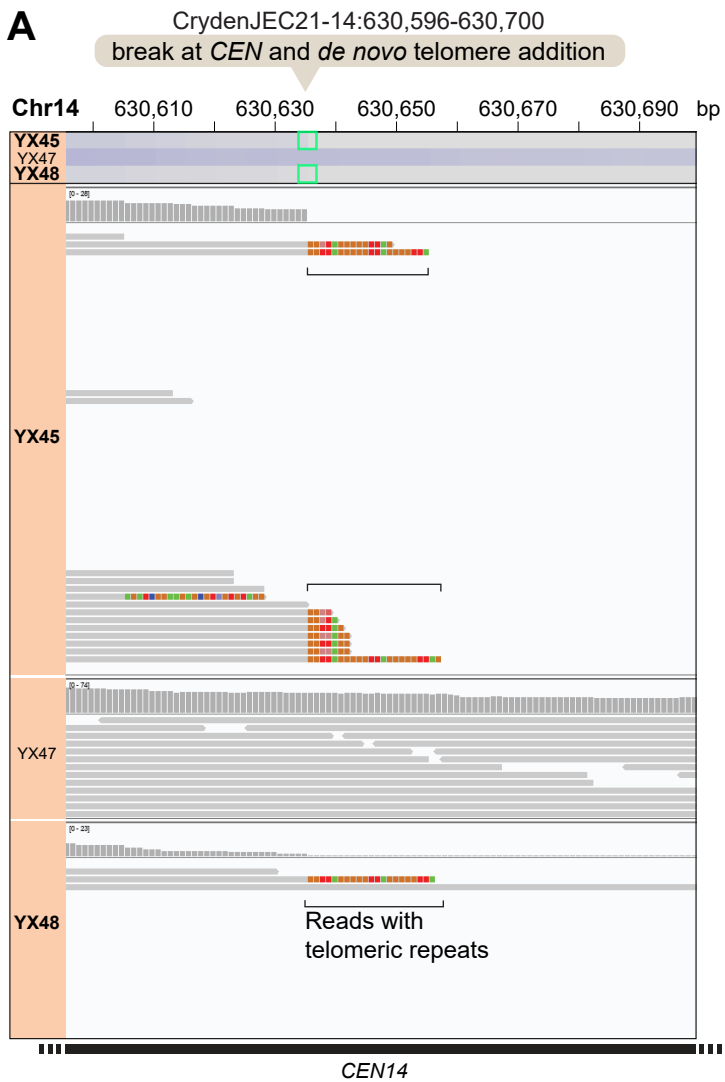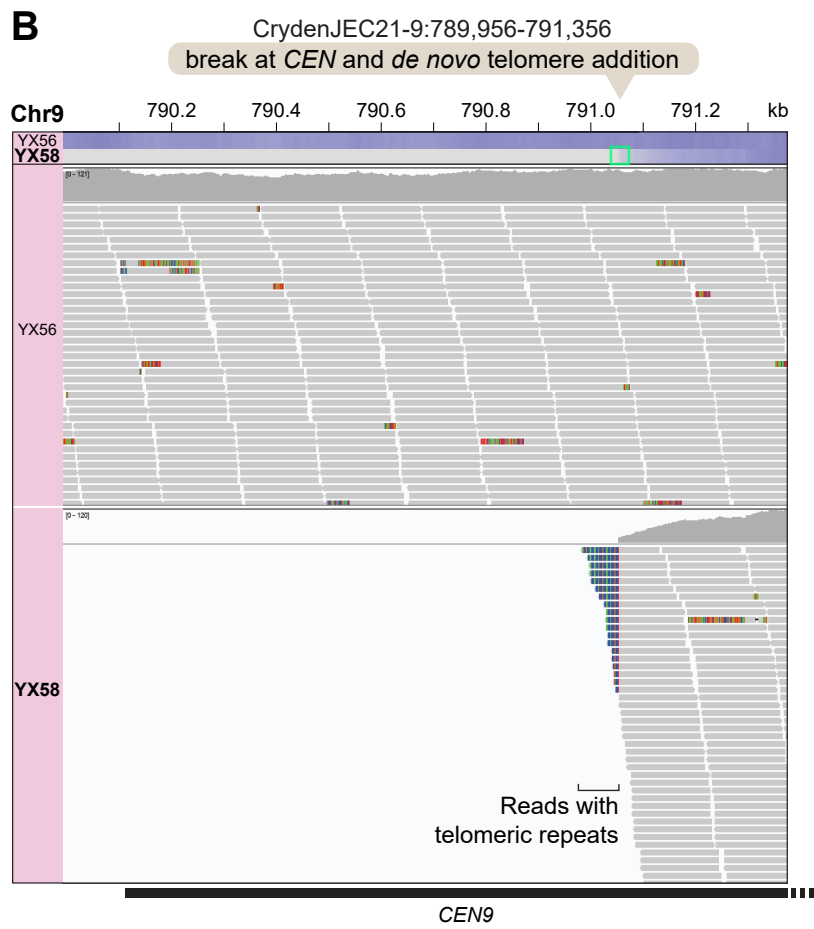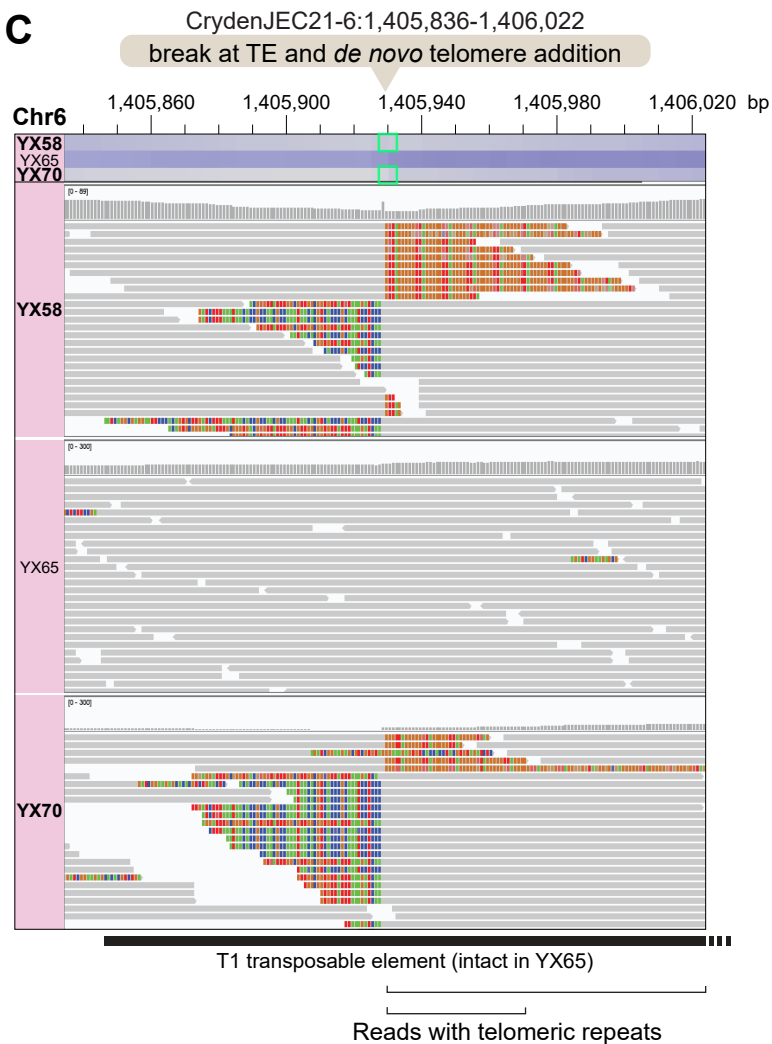

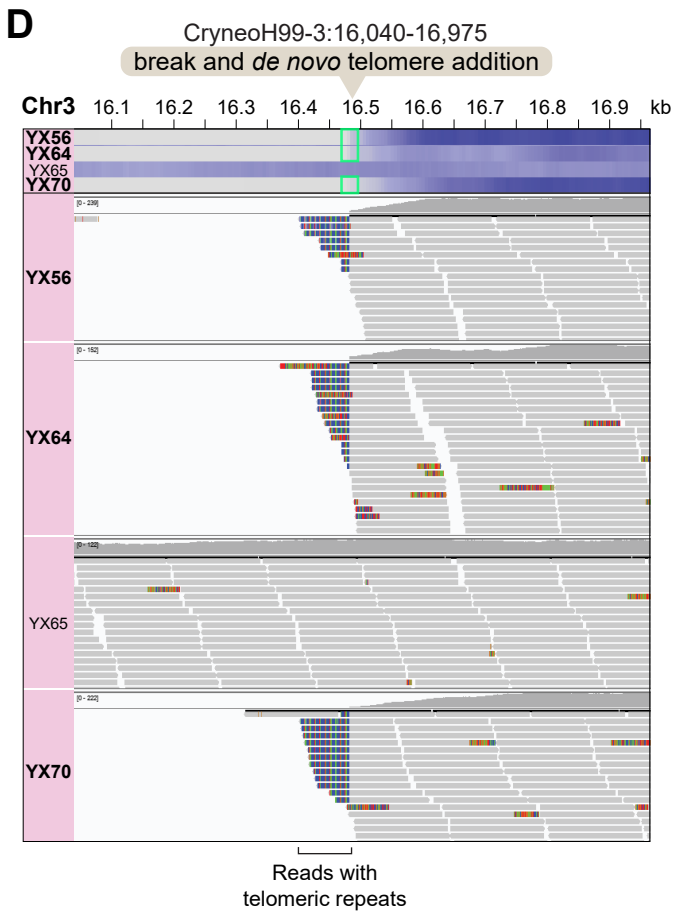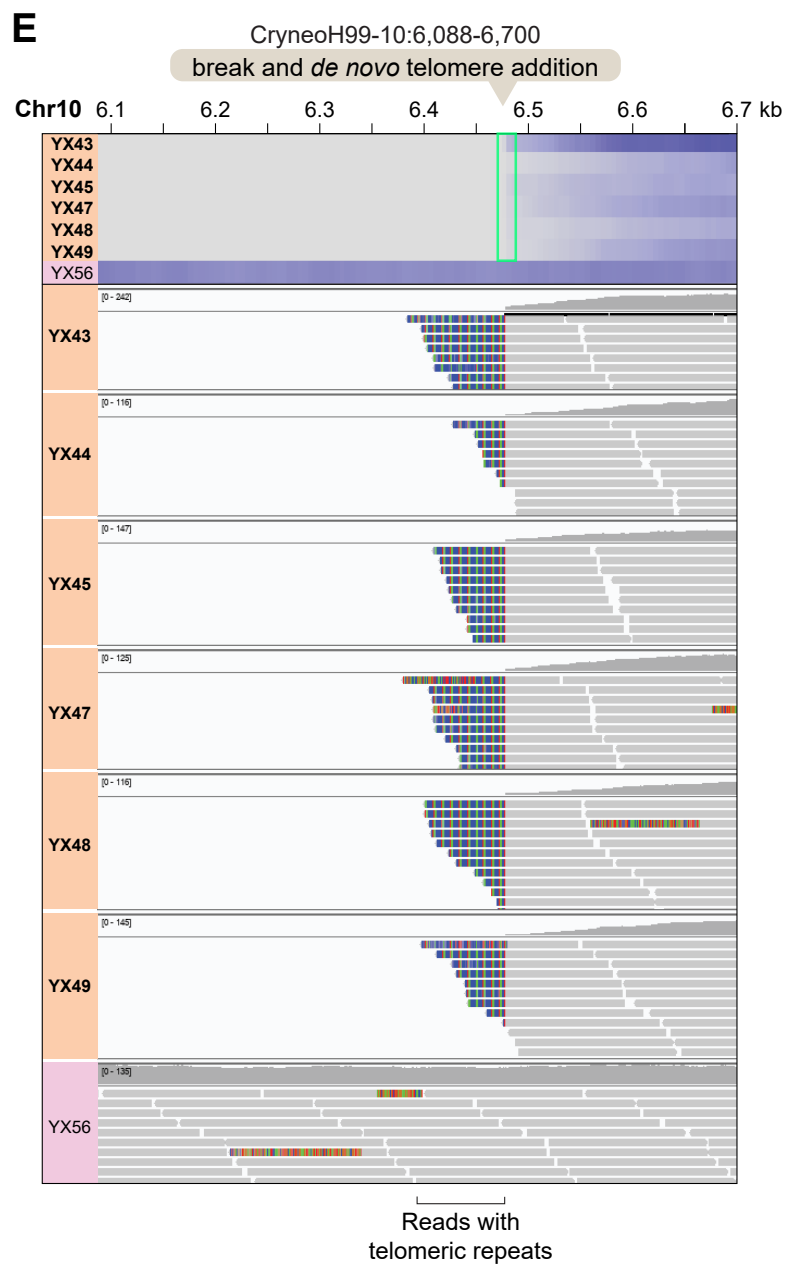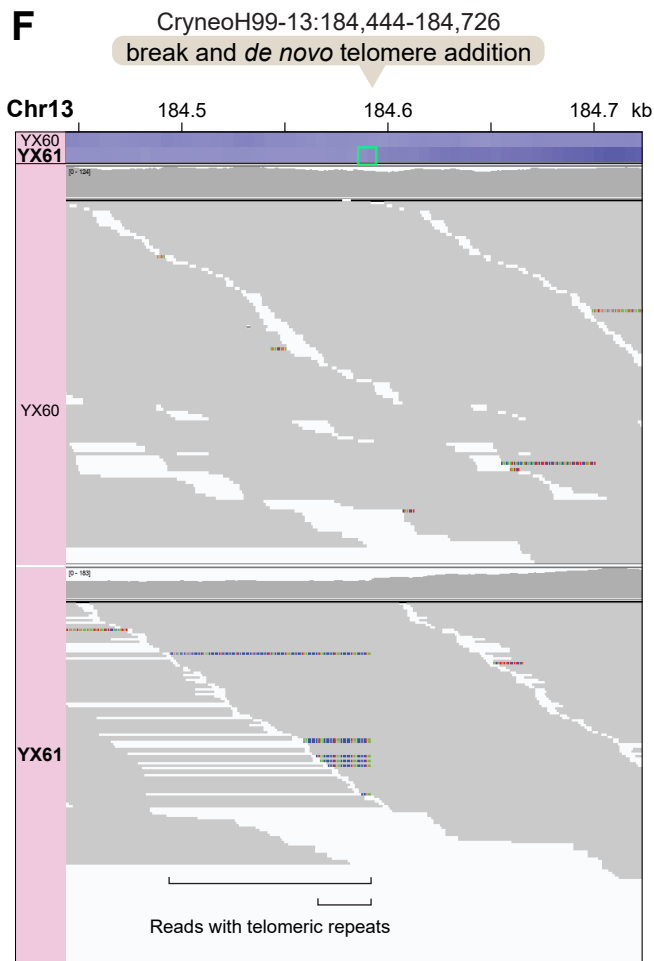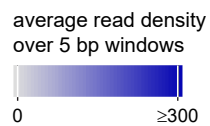

Supplement: pgen.1008871.s023.pdf [file pgen.1008871.s023.pdf]
